# Supplementary material for: Functional Specialization of the Small Interfering RNA Pathway in Response to Virus Infection
Source: PubMed Central journal article supplement (PMC3757037; doi:10.1371/journal.ppat.1003579), 2013-08-29
Supplement: ppat.1003579.s008.pdf [file ppat.1003579.s008.pdf]

**Table S1: Statistical analysis of the differences in median survival to viral infection in different *Drosophila* mutants.**

| <b>Within groups</b>       |                             |                |
|----------------------------|-----------------------------|----------------|
| <b>Genotype</b>            | <b>Treatment comparison</b> | <b>p value</b> |
| R2D2/+                     | Control vs Mock             | 0.9610         |
|                            | Mock vs SINV                | 0.6707         |
|                            | Mock vs VSV                 | 0.2659         |
| R2D2                       | Control vs Mock             | 0.0495         |
|                            | Mock vs SINV                | 0.0112         |
|                            | Mock vs VSV                 | 0.0000         |
| loqs/+                     | Control vs Mock             | 0.0703         |
|                            | Mock vs SINV                | 0.2549         |
|                            | Mock vs VSV                 | 0.0269         |
| loqs                       | Control vs Mock             | 0.0707         |
|                            | Mock vs SINV                | 0.3409         |
|                            | Mock vs VSV                 | 0.4444         |
| loqs-R2D2                  | Control vs Mock             | 0.6224         |
|                            | Mock vs SINV                | 0.6230         |
|                            | Mock vs VSV                 | 0.0022         |
| <b>Between groups</b>      |                             |                |
| <b>Genotype comparison</b> | <b>Treatment</b>            | <b>p value</b> |
| R2D2/+ vs R2D2             | control                     | 0.2698         |
|                            | Mock                        | 0.0240         |
|                            | SINV                        | 0.0033         |
|                            | VSV                         | 0.0003         |
| loqs/+ vs loqs             | control                     | 0.1711         |
|                            | Mock                        | 0.0216         |
|                            | SINV                        | 0.3845         |
|                            | VSV                         | 0.9142         |
| R2D2 vs loqs-R2D2          | control                     | 0.3255         |
|                            | Mock                        | 0.1928         |
|                            | SINV                        | 0.1598         |
|                            | VSV                         | 0.0784         |
| loqs vs loqs-R2D2          | control                     | 0.6062         |
|                            | Mock                        | 0.9064         |
|                            | SINV                        | 0.0069         |
|                            | VSV                         | 0.0073         |
