# Supplementary material for: Functional Specialization of the Small Interfering RNA Pathway in Response to Virus Infection
Source: PubMed Central journal article supplement (PMC3757037; doi:10.1371/journal.ppat.1003579), 2013-08-29
Supplement: ppat.1003579.s009.pdf [file ppat.1003579.s009.pdf]

**Table S2: Summary of the raw numbers from the analysis of the libraries described in this manuscript \***

|                          |                     | Accession number / Genotype / Virus |                     |                    |                    |                  |                     |                     |
|--------------------------|---------------------|-------------------------------------|---------------------|--------------------|--------------------|------------------|---------------------|---------------------|
|                          |                     | wildtype<br>VSV                     | <i>Dcr-2</i><br>VSV | <i>R2D2</i><br>VSV | <i>loqs</i><br>VSV | wildtype<br>SINV | <i>R2D2</i><br>SINV | <i>loqs</i><br>SINV |
| <b><i>Drosophila</i></b> | <b>Transposons</b>  | 270,004                             | 143,855             | 258,526            | 394,908            | 785,990          | 438,317             | 428,773             |
|                          | <b>rRNA</b>         | 272,942                             | 734,810             | 1,044,725          | 757,782            | 2,138,283        | 2,711,555           | 3,184,455           |
|                          | <b>miRNA</b>        | 1,658,683                           | 1,705,365           | 1,838,877          | 2,381,020          | 14,249,539       | 18,752,818          | 11,928,073          |
|                          | <b>repeat</b>       | 3,215,314                           | 2,596,031           | 4,013,364          | 5,452,095          | 11,696,828       | 7,127,218           | 8,768,479           |
|                          | <b>mRNA</b>         | 259,933                             | 78,834              | 150,161            | 215,182            | 895,951          | 656,939             | 387,897             |
|                          | <b>No features</b>  | 598,262                             | 346,507             | 499,296            | 813,823            | 2,302,877        | 2,029,849           | 1,617,725           |
|                          | <b>Total mapped</b> | 5,819,185                           | 4,780,693           | 6,603,072          | 8,944,210          | 29,252,701       | 28,659,279          | 22,793,038          |
| <b>Virus</b>             | <b>VSV</b>          | 1,812                               | 576                 | 19,832             | 7,937              | 1                | 1                   | 0                   |
|                          | <b>SINV</b>         | 0                                   | 0                   | 1                  | 5                  | 3,463            | 20,143              | 5,612               |
|                          | <b>Unmapped</b>     | 35,367,429                          | 69,212,383          | 62,627,769         | 59,910,280         | 64,490,603       | 58,881,128          | 70,411,133          |
|                          | <b>Total</b>        | 47,461,752                          | 79,598,478          | 77,035,790         | 78,869,300         | 125,812,772      | 119,257,103         | 119,519,573         |

\*Number of total reads in the library assigned per feature in the *Drosophila* genome or to VSV and SINV genomes. Reads >16 nt were considered.
