# Supplementary material for: Functional Specialization of the Small Interfering RNA Pathway in Response to Virus Infection
Source: PubMed Central journal article supplement (PMC3757037; doi:10.1371/journal.ppat.1003579), 2013-08-29
Supplement: ppat.1003579.s011.pdf [file ppat.1003579.s011.pdf]

**Table S4: Statistical analysis of C-enrichment and U-depletion at the first position of 21-nt reads**

|                                                | <b>C-enrichment at position 1 in the 5' end</b> |             |                    |                    |             |             |
|------------------------------------------------|-------------------------------------------------|-------------|--------------------|--------------------|-------------|-------------|
| <b>Virus</b>                                   | VSV                                             |             |                    |                    |             |             |
| <b>Genotype</b>                                | wildtype                                        |             | <i>R2D2</i>        |                    | <i>loqs</i> |             |
| <b>Genome strand</b>                           | plus                                            | minus       | plus               | minus              | plus        | minus       |
| <b><i>p</i> value (vs genome composition)</b>  | 4.96E-08                                        | 4.50E-05    | <b>0.374597356</b> | 2.36E-04           | 1.50E-11    | 1.68E-14    |
| <b><i>p</i> value (vs read nt composition)</b> | 3.47E-06                                        | 0.015226039 | <b>0.999138769</b> | <b>0.980383249</b> | 0.003972282 | 0.003742173 |
| <b>Virus</b>                                   | SINV                                            |             |                    |                    |             |             |
| <b>Genotype</b>                                | wildtype                                        |             | R2D2               |                    | loqs        |             |
| <b>Genome strand</b>                           | plus                                            | minus       | plus               | minus              | plus        | minus       |
| <b><i>p</i> value (vs genome composition)</b>  | 3.59E-05                                        | 1.79E-08    | <b>0.241676722</b> | 1.53E-10           | 0.000162761 | 0.00E+00    |
| <b><i>p</i> value (vs read nt composition)</b> | 0.002804033                                     | 5.78E-06    | <b>0.955041929</b> | 0.000356005        | 0.030168561 | 1.10E-11    |

|                                                | <b>U depletion at position 1 in the 5' end</b> |                    |                    |                    |                    |             |
|------------------------------------------------|------------------------------------------------|--------------------|--------------------|--------------------|--------------------|-------------|
| <b>Virus</b>                                   | VSV                                            |                    |                    |                    |                    |             |
| <b>Genotype</b>                                | wildtype                                       |                    | <i>R2D2</i>        |                    | <i>loqs</i>        |             |
| <b>Genome strand</b>                           | plus                                           | minus              | plus               | minus              | plus               | minus       |
| <b><i>p</i> value (vs genome composition)</b>  | 2.38E-10                                       | 3.49E-06           | 1.95E-18           | 4.21E-18           | 4.00E-13           | 4.32E-20    |
| <b><i>p</i> value (vs read nt composition)</b> | 3.12E-08                                       | 0.001503414        | 1.29E-11           | 2.45E-10           | 4.31E-13           | 6.18E-20    |
| <b>Virus</b>                                   | SINV                                           |                    |                    |                    |                    |             |
| <b>Genotype</b>                                | wildtype                                       |                    | R2D2               |                    | loqs               |             |
| <b>Genome strand</b>                           | plus                                           | minus              | plus               | minus              | plus               | minus       |
| <b><i>p</i> value (vs genome composition)</b>  | 0.049606029                                    | 0.038331565        | <b>0.997226278</b> | <b>0.979822358</b> | <b>0.74128436</b>  | 0.034639679 |
| <b><i>p</i> value (vs read nt composition)</b> | <b>0.167905594</b>                             | <b>0.053154857</b> | <b>0.999999992</b> | <b>0.999955092</b> | <b>0.824744834</b> | 0.008304462 |

Values above 0.05 are highlighted in bold.
