# Supplementary material for: Functional Specialization of the Small Interfering RNA Pathway in Response to Virus Infection
Source: PubMed Central journal article supplement (PMC3757037; doi:10.1371/journal.ppat.1003579), 2013-08-29
Supplement: ppat.1003579.s012.pdf [file ppat.1003579.s012.pdf]

**Table S5: Pairwise correlation of vsiRNA density along viral genomes**

| <b>VSV antigenome</b>  |           |             |             |
|------------------------|-----------|-------------|-------------|
|                        | wildtype  | <i>R2D2</i> | <i>loqs</i> |
| wildtype               | 1.0000000 | 0.3568898   | 0.3934236   |
| <i>R2D2</i>            | 0.3568898 | 1.0000000   | 0.5839180   |
| <i>loqs</i>            | 0.3934236 | 0.5839180   | 1.0000000   |
| <b>VSV genome</b>      |           |             |             |
|                        | wildtype  | <i>R2D2</i> | <i>loqs</i> |
| wildtype               | 1.0000000 | 0.4267428   | 0.4265496   |
| <i>R2D2</i>            | 0.4267428 | 1.0000000   | 0.6530834   |
| <i>loqs</i>            | 0.4265496 | 0.6530834   | 1.0000000   |
| <b>SINV genome</b>     |           |             |             |
|                        | wildtype  | <i>R2D2</i> | <i>loqs</i> |
| wildtype               | 1.0000000 | 0.3878873   | 0.4133285   |
| <i>R2D2</i>            | 0.3878873 | 1.0000000   | 0.5683794   |
| <i>loqs</i>            | 0.4133285 | 0.5683794   | 1.0000000   |
| <b>SINV antigenome</b> |           |             |             |
|                        | wildtype  | <i>R2D2</i> | <i>loqs</i> |
| wildtype               | 1.0000000 | 0.3504123   | 0.3534574   |
| <i>R2D2</i>            | 0.3504123 | 1.0000000   | 0.5289832   |
| <i>loqs</i>            | 0.3534574 | 0.5289832   | 1.0000000   |
