# Supplementary material for: Functional Specialization of the Small Interfering RNA Pathway in Response to Virus Infection
Source: PubMed Central journal article supplement (PMC3757037; doi:10.1371/journal.ppat.1003579), 2013-08-29
Supplement: ppat.1003579.s013.pdf [file ppat.1003579.s013.pdf]

**Table S6: Comparative analysis of SOLiD and Illumina libraries:**

| Original work | Organism                       | Sample                    | Platform | Virus | number of reads |                |                          | % mapped | 21-nt reads |
|---------------|--------------------------------|---------------------------|----------|-------|-----------------|----------------|--------------------------|----------|-------------|
|               |                                |                           |          |       | Total           | Post-filtering | Mapped against the virus |          |             |
| Mueller et al | <i>Drosophila melanogaster</i> | S2 cells                  | illumina | VSV   | 5,347,026       | 5,116,387      | 46,538                   | 0.909    | 37,472      |
|               |                                | wildtype                  | illumina | VSV   | 6,597,381       | 6,294,884      | 6,707                    | 0.106    | 4,897       |
|               |                                | <i>Ago2</i> [414] mutants | illumina | VSV   | 7,159,317       | 6,895,521      | 598,799                  | 8.684    | 440,689     |
| Myles et al   | <i>Aedes aegypti</i>           | wildtype                  | illumina | SINV  | 4,376,164       | 4,034,966      | 581,211                  | 14.40    | 486,730     |
| This work     | <i>Drosophila melanogaster</i> | wildtype                  | SOLiD    | VSV   | 39,377,073      | 25,902,134     | 2,461                    | 0.0095   | 1,891       |
|               |                                | <i>R2D2</i> mutants       | SOLiD    | VSV   | 70,200,097      | 36,787,341     | 41,137                   | 0.1118   | 27,106      |
|               |                                | wildtype                  | SOLiD    | SINV  | 96,488,223      | 66,619,853     | 3,544                    | 0.0053   | 2,577       |
|               |                                | <i>R2D2</i> mutants       | SOLiD    | SINV  | 90,177,938      | 62,472,641     | 21,377                   | 0.0342   | 15,219      |
