# Supplementary material for: Functional Specialization of the Small Interfering RNA Pathway in Response to Virus Infection
Source: PubMed Central journal article supplement (PMC3757037; doi:10.1371/journal.ppat.1003579), 2013-08-29
Supplement: ppat.1003579.s014.pdf [file ppat.1003579.s014.pdf]

**Table S7: Pairwise correlation of vsiRNA density along the VSV genomes in wildtype flies between the libraries in our study and Mueller et al.**

|                       | <b>Correlation</b> |
|-----------------------|--------------------|
| <b>VSV antigenome</b> | 0.08945145         |
| <b>VSV genome</b>     | 0.1340179          |
