# Supplementary material for: Functional Specialization of the Small Interfering RNA Pathway in Response to Virus Infection
Source: PubMed Central journal article supplement (PMC3757037; doi:10.1371/journal.ppat.1003579), 2013-08-29
Supplement: ppat.1003579.s015.pdf [file ppat.1003579.s015.pdf]

**Table S8: Oligonucleotides**

|                           |             |                      | <b>Genomic location</b> | <b>sequence</b>           |
|---------------------------|-------------|----------------------|-------------------------|---------------------------|
| <b>Strand specific RT</b> | <b>SINV</b> | <b>+ genome RT</b>   | SINV 6362R              | gagcacatTTTgtagcgtgTTC    |
|                           |             | <b>- genome RT</b>   | SINV 196L               | cgcAtctggccagTaaactaa     |
|                           | <b>VSV</b>  | <b>+ genome RT</b>   | VSV 6521L               | tTcggaccaattccagagat      |
|                           |             | <b>- genome RT</b>   | VSV 10865R              | gcaattTgcatagccaatca      |
| <b>qPCR</b>               | <b>SINV</b> | <b>Left Primer</b>   | SINV 3097 - 3114        | cgTtcagctgcaagacca        |
|                           |             | <b>Right Primer</b>  | SINV 3144 - 3162        | taccggccgtggctagtat       |
|                           |             | <b>Left Primer*</b>  | SINV 11039 - 11057      | aggTcaatgccccgtacat       |
|                           |             | <b>Right Primer*</b> | SINV 11078 - 11100      | catgtactgtcgactctTggaga   |
|                           | <b>VSV</b>  | <b>Left Primer</b>   | VSV 8765 - 8787         | cctTttagaagggaaTtTggaagaa |
|                           |             | <b>Right Primer</b>  | VSV 8804 - 8824         | tctgcccgactTgataggattg    |

\* Oligonucleotides utilized for the detection of SINV RNA after embryo injections
